# Supplementary material for: Tungsten oxide, magnetic and Cu-doped magnetic nanoparticles mixtures with cyromazine as promising eco-friendly strategies to control of Spodoptera littoralis (Boisd.) (Lepidoptera: Noctuidae)
Source: Research Square preprint supplement (doi:10.21203/rs.3.rs-2818970/v1), 2023-04-25
Supplement: Supplementary file 1 [file e0f5cefe4d59caa1e8bd304f.docx]

**Graphical Abstract**


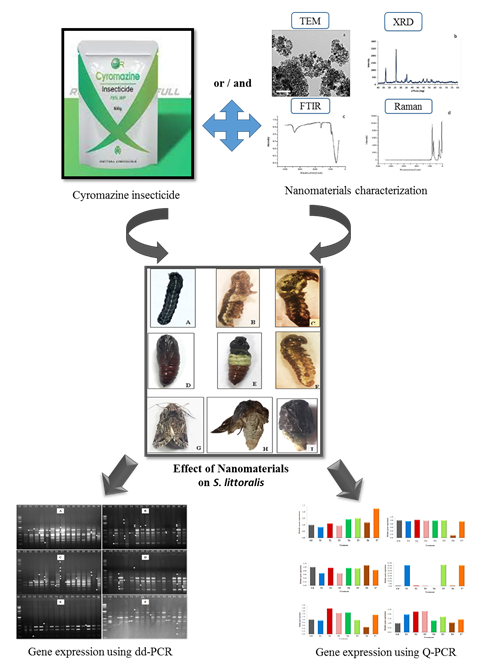
The different effects of tungsten oxide, magnetic nanoparticles, and Cu-doped magnetic nanoparticles in comparison with the insecticide, cyromazine against Spodoptera littoralis stages. Study of insect immune responses against the examined nanomaterials using dd-PCR and Q-PCR. The possibility of using nanoparticles and inserting them as promising control agents within integrated pest management (IPM) exists.
